# Supplementary material for: Functionalized amino acid-based injectable hydrogels for sustained drug delivery
Source: Royal Society of Chemistry journal article supplement (doi:10.1039/d4sm01402b), 2025-01-01
Supplement: d4sm01402b1.pdf [file d4sm01402b1.pdf]

## Electronic Supplementary Information

---

### Functionalized amino acid-based injectable hydrogel for sustained drug delivery

*Arpita Roy,<sup>\*a</sup> Kalipada Manna,<sup>a</sup> Shaon Dey,<sup>a</sup> Kanta Chakraborty,<sup>b</sup> Santanu Dhara,<sup>b</sup> Sagar Pal<sup>\*a</sup>*

<sup>a</sup> Department of Chemistry and Chemical Biology, Indian Institute of Technology (ISM), Dhanbad-826004, India.

<sup>b</sup> School of Medical Science and Technology, Indian Institute of Technology, Kharagpur-721302, India.

### Corresponding Author

\*E-mail: Prof. Sagar Pal ([sagarpal@iitism.ac.in](mailto:sagarpal@iitism.ac.in); Tel: +91-326-2235769),

Arpita Roy ([arpitachem28@gmail.com](mailto:arpitachem28@gmail.com)). [Current Address: Department of Chemical and Biomolecular Engineering, University of California, Los Angeles, USA]

## **Instrumentation**

### **Field Emission Scanning Electron Microscopy (FESEM)**

The microstructure of freeze-dried hydrogels was captured by using FESEM (FESEM Supra 55, Make – Zeiss, Germany) operating at an accelerating voltage of 5 kV and an emission current of 10  $\mu$ A. Hydrogel disks were shaped in a 24-well plate and freeze-dried. Lastly, samples were sputter-coated with platinum before FESEM observation.

### **Nuclear Magnetic Resonance (NMR) Spectroscopy**

The  $^1\text{H}$  and  $^{13}\text{C}$  NMR spectra of Gly-MA and *cl*- $\beta$ -CD-g-p(Gly-MA) hydrogel were recorded by a 400 MHz NMR Bruker Avance III HD (400 MHz) spectrometer using DMSO- $\text{d}_6$  as a solvent.

### **UV-visible Spectroscopy**

UV-visible spectrophotometer (Shimadzu, Japan: Model: UV 1800) was used to record all UV-visible spectra.

## **Evaluation of *in vitro* cytocompatibility**

### **MTT assay**

The newly synthesized *cl*- $\beta$ -CD-g-p(Gly-MA) hydrogel was washed thoroughly using PBS thrice to remove the unwanted impurities and sterilized using UV light for 2 hours. On the other hand, HeLa and L929 (both the cell lines were obtained from National Centre for Cell Science, Pune) cells were cultured in DMEM media (Gibco) supplemented with 10% FBS, 100 units/mL penicillin, and 100  $\mu\text{g}/\text{mL}$  streptomycin, in a 5%  $\text{CO}_2$  atmosphere at 37  $^\circ\text{C}$ . After 3 days, cells were detached from tissue culture flasks using trypsin (Gibco). Equal numbers of cells (5000 cells/well in 200  $\mu\text{L}$ ) were seeded onto the *cl*- $\beta$ -CD-g-p(Gly-MA) hydrogel surface in 96-well plates. Cell density was measured using an automatic cell counter (Countess® II, Life Technologies). The MTT assay was performed on *cl*- $\beta$ -CD-g-p(Gly-MA) hydrogel and control (TCP) after 24 and 72 h. MTT reagent (Sigma Aldrich, US) was added to each well at a final concentration of 0.5 mg/mL and incubated at 37  $^\circ\text{C}$  for 4 h. The media was then removed, and 150  $\mu\text{L}$  of dimethyl sulfoxide (DMSO) was added to dissolve the formazan crystals. After a 15-minute incubation at 37  $^\circ\text{C}$ , absorbance was measured using a Thermo Scientific Multiskan FC microplate reader with a 620 nm filter. Cell viability was calculated using (Eq S1)<sup>1,2</sup>

$$\% \text{ Cell viability} = \frac{\text{OD}_{620}(\text{Sample}) - \text{OD}_{620}(\text{Blank})}{\text{OD}_{620}(\text{Control}) - \text{OD}_{620}(\text{Blank})} \times 100 \text{-----Eq (S1)}$$

### **Live-dead assay**

Cell viability on the hydrogel seeded with L929 cells was assessed using the live/dead assay (Invitrogen, USA) according to the manufacturer's protocol. The hydrogel samples were UV-sterilized for 2 h. After overnight incubation in culture media, approximately 5000 cells per well were seeded onto the scaffolds and incubated at 37 °C for 24 and 72 h. After the incubation periods, the media was discarded. Live/dead staining dye was applied, and the scaffolds were incubated at 37 °C for 20 minutes. Fluorescence images were captured using an inverted fluorescence microscope (Carl Zeiss, Germany) with excitation filters of 450–490 nm (green, Calcein AM) and 510–560 nm (red, ETD-1) using ZEN software.<sup>1</sup>

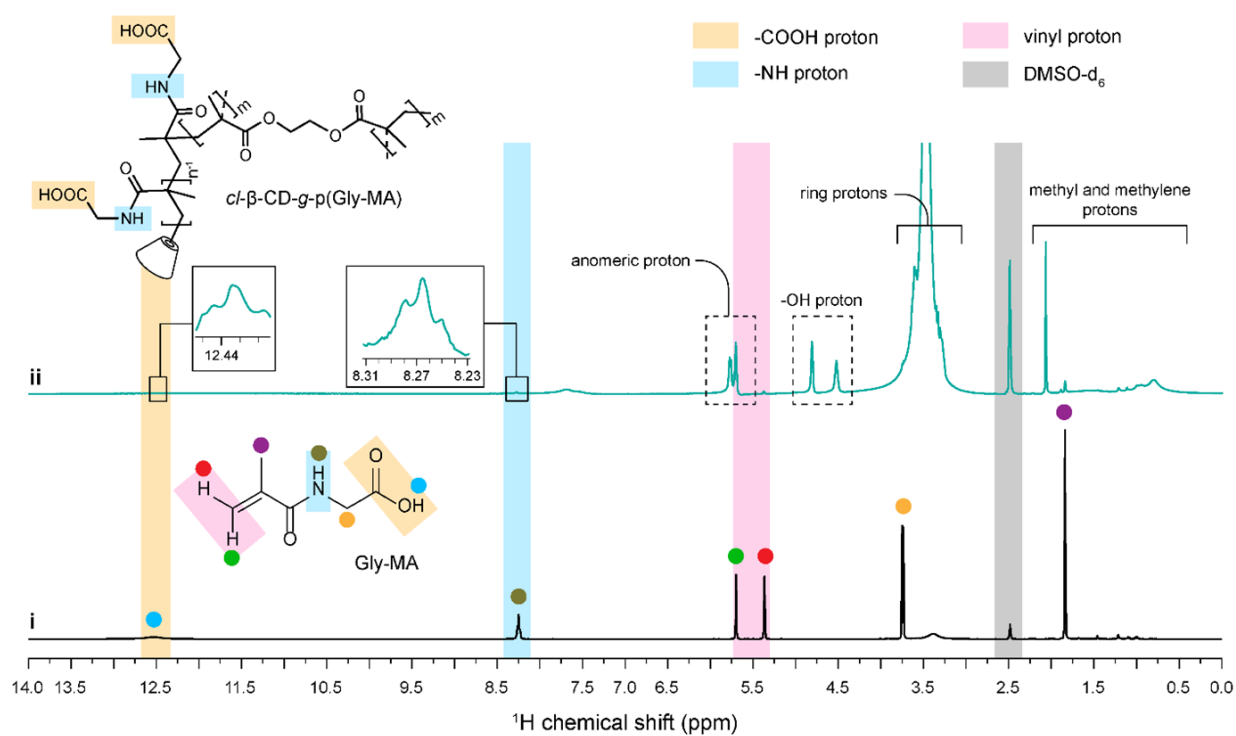

**Fig. S1** <sup>1</sup>H NMR spectra of (i) Gly-MA and (ii) *cl*-β-CD-g-p(Gly-MA) hydrogel. [Reused from Fig. 2 of Ref. 3]

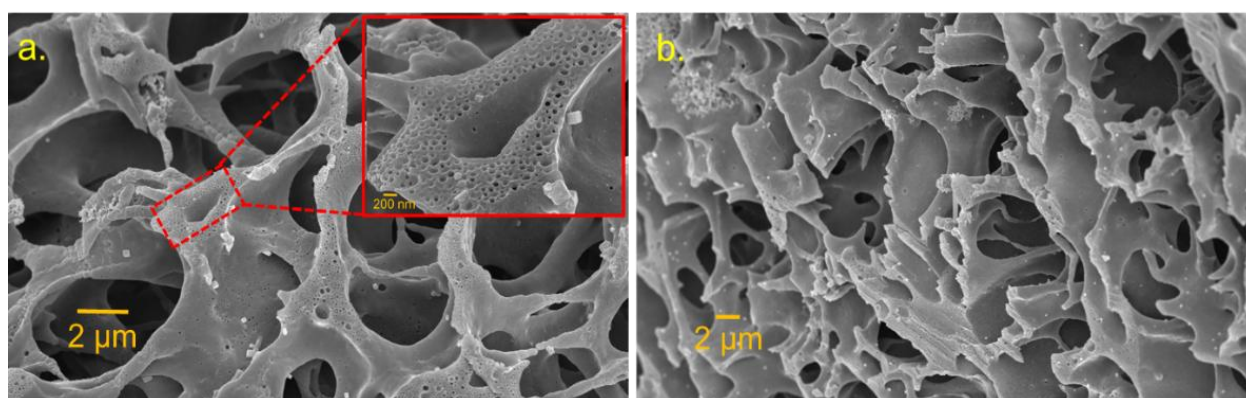

**Fig. S2** (a) FESEM image of the developed injectable hydrogel *cl*-β-CD-g-p(Gly-MA) (b) Cross-sectional image of the pores of the hydrogel. [Reused from Fig. 2 of Ref. 3].

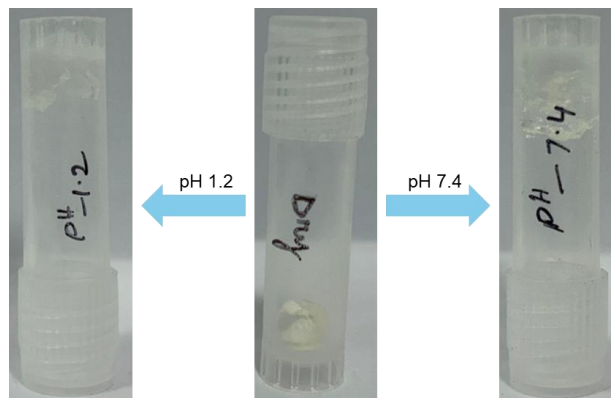

**Fig. S3** Digital images of dried and swollen hydrogel at pH 1.2 and 7.4.

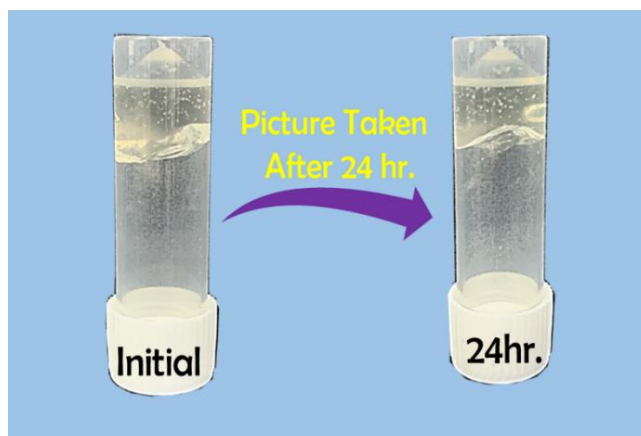

**Fig. S4** Inverted picture of the hydrogel in a vial for 24 h. [Reused from Fig. 4b of Ref. 3]

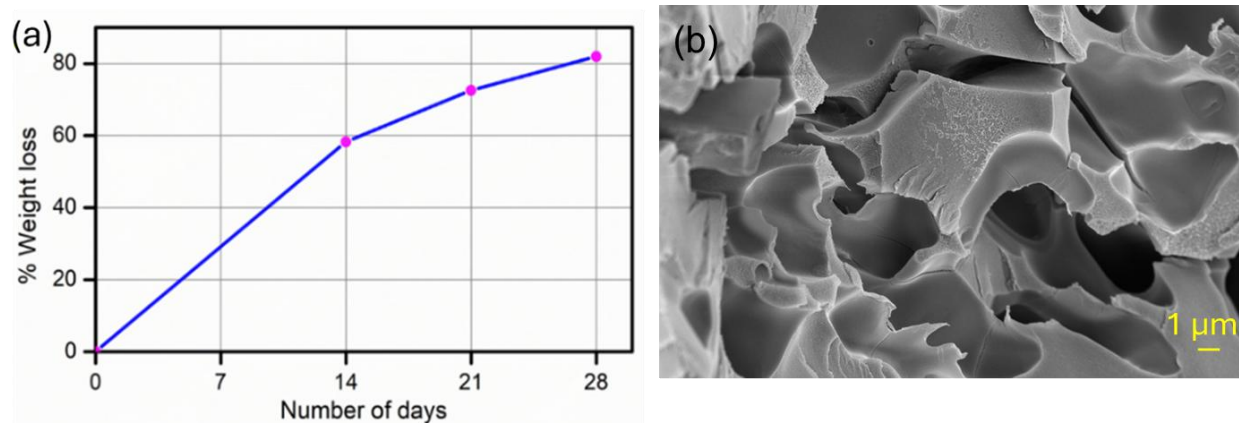

**Fig. S5** (a) Weight loss vs time plot confirming *in vitro* enzymatic degradation of the gel. [Reused from Fig. 3 of Ref. 3]. (b) FESEM morphology of the 28 days degraded freeze-dried hydrogel.

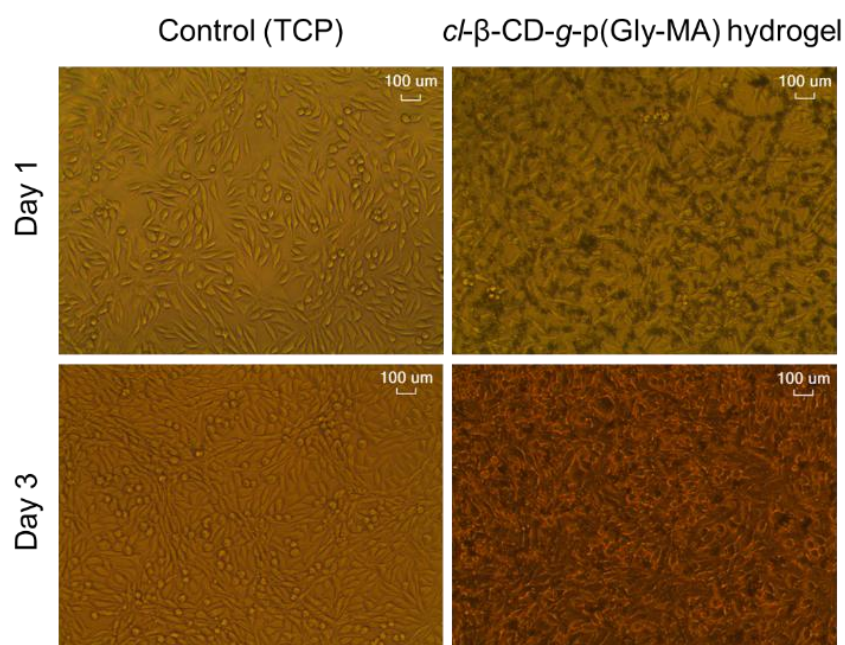

**Fig. S6** Bright-field images of 3T3 cells seeded on the hydrogel and TCP after days 1 and 3.

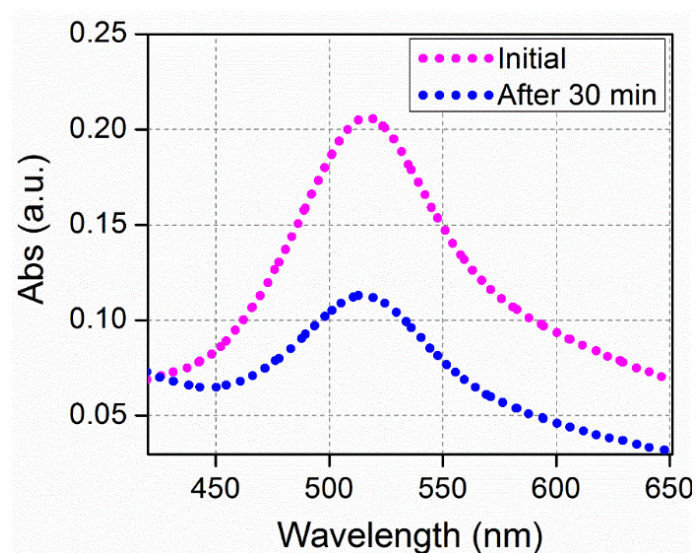

**Fig. S7** UV-visible spectra for DPPH peak reduction in the presence of the synthesized hydrogel.

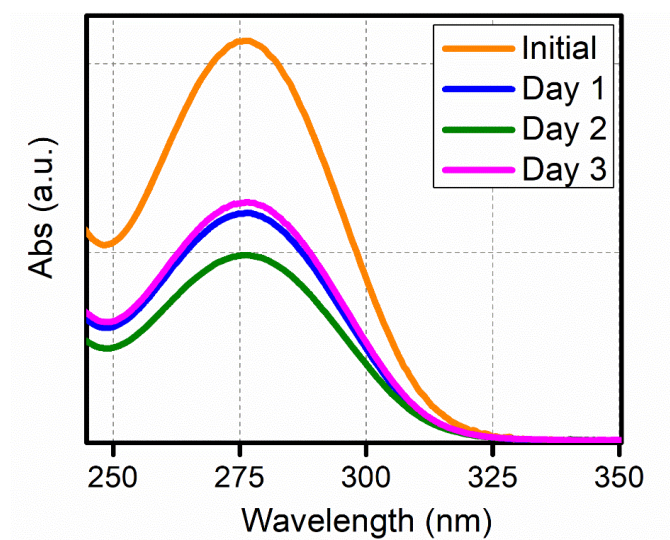

**Fig. S8** UV-visible spectra for *in vitro* drug loading pattern.

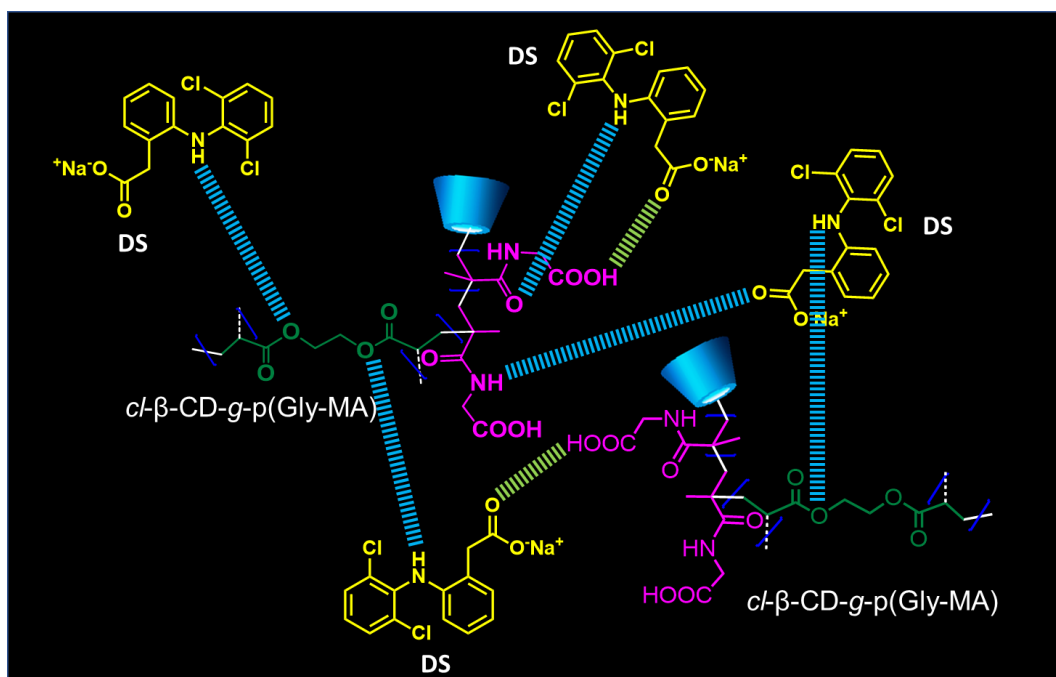

**Fig. S9** Feasible interactions between *cl*-β-CD-*g*-p(Gly-MA) hydrogel and DS drug.

**Table S1.** % loading and % entrapment of DS in *cl*-β-CD-*g*-p(Gly-MA) hydrogel.

| Matrix                               | Time (h)  | % Loading   | % Entrapment |
|--------------------------------------|-----------|-------------|--------------|
| <i>cl</i> -β-CD- <i>g</i> -p(Gly-MA) | 24        | 18          | 39.2         |
|                                      | <b>48</b> | <b>23.4</b> | <b>55.3</b>  |
|                                      | 72        | 19.2        | 38.9         |

## Reference

1. A. Roy, P. Guha Ray, K. Manna, C. Banerjee, S. Dhara and S. Pal, Biomacromolecules, 2021, 22, 5256-5269.
2. A. Roy, K. Manna, P. G. Ray, S. Dhara and S. Pal, ACS Applied Materials & Interfaces, 2022, 14, 17065-17080.
3. A. Roy and S. Pal, IN Patent Application No. 202331064343, 2023.
