# Supplementary material for: Functionalized amino acid-based injectable hydrogels for sustained drug delivery
Source: Royal Society of Chemistry journal article supplement (doi:10.1039/d4sm01402b), 2025-01-01
Supplement: d4sm01402b2.xlsx [file d4sm01402b2.xlsx]

## Sheet: Meta Data Pubmed-Other
Sl. No.	DOI	Presence	Article Type	Screening - 1	Kinetics Data	Screening - 2	Kinetics Type	Material Type	Screening-3	Final Status	Reason	Source
1	https://doi.org/10.1016/j.ijbiomac.2019.09.059	Unique	Original Research	Passed	Present	Passed	In vitro	Hydrogel	Passed	Included		PubMed
2	https://doi.org/10.1016/j.jcis.2018.10.048	Unique	Original Research	Passed	Present	Passed	In vitro	Hydrogel	Passed	Included		PubMed
3	https://doi.org/10.1016/j.ijbiomac.2020.06.133	Unique	Original Research	Passed	Present	Passed	In vitro	Hydrogel	Passed	Included		PubMed
4	https://doi.org/10.4274/tjps.84803	Unique	Original Research	Passed	Present	Passed	In vitro	Hydrogel	Passed	Included		PubMed
5	https://doi.org/10.1002/bdd.2194	Unique	Original Research	Passed	Present	Failed	Ex vivo			Excluded	No in vitro kinetics	PubMed
6	https://doi.org/10.3390/pharmaceutics13111900	Unique	Original Research	Passed	Present	Failed	Ex vivo			Excluded	Permeassion profile	PubMed
7	https://doi.org/10.3109/10717544.2014.903535	Unique	Original Research	Passed	Present	Passed	In vitro	Hydrogel	Passed	Included		PubMed
8	https://doi.org/10.1002/mabi.202000299	Unique	Original Research	Passed	Present	Passed	In vitro	Hydrogel	Passed	Included		PubMed
9	https://doi.org/10.3390/gels9050422	Unique	Original Research	Passed	Present	Passed	In vitro	Hydrogel	Passed	Included		PubMed
10	https://doi.org/10.1016/j.msec.2014.09.023	Unique	Original Research	Passed	Present	Passed	In vitro	Hydrogel	Passed	Included		PubMed
11	https://doi.org/10.3390/pharmaceutics11060262	Unique	Original Research	Passed	Present	Passed	In vitro	Hydrogel	Passed	Included		PubMed
12	https://doi.org/10.1016/j.ejpb.2007.12.021	Unique	Original Research	Passed	Present	Passed	In vitro	Hydrogel	Passed	Included		PubMed
13	https://pubmed.ncbi.nlm.nih.gov/15881815/	Unique	Original Research	Failed						Excluded	Inaccessible	PubMed
14	https://doi.org/10.3390/ph15091106	Unique	Original Research	Passed	Present	Passed	In vitro	Hydrogel	Passed	Included		PubMed
15	https://doi.org/10.1016/j.carbpol.2015.04.022	Unique	Original Research	Passed	Present	Passed	In vitro	Hydrogel	Passed	Included		PubMed
16	https://doi.org/10.1016/j.xphs.2021.09.026	Unique	Original Research	Passed	Present	Failed	In vivo	Hydrogel	Passed	Excluded	No in vitro kinetics	PubMed
17	https://doi.org/10.1167/tvst.10.14.5	Unique	Original Research	Failed						Excluded	Bromofenac sodium was used	PubMed
18	https://doi.org/10.1208/s12249-021-02082-y	Unique	Original Research	Passed	Present	Passed	In vitro	Hydrogel	Passed	Included		PubMed
19	https://doi.org/10.3109/10717544.2014.898111	Unique	Original Research	Passed	Present	Failed	Ex vivo			Excluded	No in vitro kinetics	PubMed
20	https://doi.org/10.1016/j.ijbiomac.2023.126275	Unique	Original Research	Passed	Present	Passed	In vitro	Hydrogel	Passed	Included		PubMed
21	https://doi.org/10.1016/j.msec.2020.111346	Unique	Original Research	Passed	Present	Passed	In vitro	Hydrogel	Passed	Excluded	Insufficient Data	PubMed
22	https://doi.org/10.1016/j.ejpb.2020.07.033	Unique	Original Research	Passed	Present	Passed	In vitro	Hydrogel	Passed	Included		PubMed
23	https://doi.org/10.3390/polym12112687	Unique	Original Research	Passed	Present	Passed	In vitro	Hydrogel	Passed	Included		PubMed
24	https://doi.org/10.3390/biom9100593	Unique	Original Research	Passed	Present	Passed	In vitro	Other	Failed	Excluded	Vesicles	PubMed
25	https://doi.org/10.1016/j.ejpb.2018.04.017	Unique	Original Research	Passed	Present	Passed	In vitro	Hydrogel	Passed	Included		PubMed
26	https://pubmed.ncbi.nlm.nih.gov/16238037/	Unique	Original Research	Failed						Excluded	Inaccessible	PubMed
27	https://doi.org/10.3109/03639045.2014.938658	Unique	Original Research	Passed	Present	Passed	In vitro	Hydrogel	Passed	Excluded	Insufficient Data	PubMed
28	https://doi.org/10.1208/s12249-010-9544-3	Unique	Original Research	Passed	Present	Passed	In vitro	Hydrogel	Passed	Excluded	Insufficient Data	PubMed
29	https://doi.org/10.1080/10717540590952537	Unique	Original Research	Passed	Present	Passed	In vitro	Other	Failed	Excluded	Polysaccharide spheres	PubMed
30	https://doi.org/10.7507/1002-1892.202302105	Unique	Not Found	Failed						Excluded	Chinese Language	PubMed
31	https://doi.org/10.1016/s0168-3659(03)00123-8	Unique	Original Research	Passed	Present	Failed	Ex vivo			Excluded	Insufficient Data	PubMed
32	https://doi.org/10.1081/ddc-100107253	Unique	Original Research	Passed	Present	Passed	In vitro	Hydrogel	Passed	Included		PubMed
33	https://doi.org/10.1002/pi.5587	Unique	Original Research	Passed	Present	Passed	In vitro	Hydrogel	Passed	Included		Other
34	https://doi.org/10.1002/star.201800243	Unique	Original Research	Passed	Present	Passed	In vitro	Hydrogel	Passed	Included		Other
35	https://doi.org/10.1007/s10570-019-02850-x	Unique	Original Research	Passed	Present	Passed	In vitro	Hydrogel	Passed	Included		Other
36	https://doi.org/10.1007/s10856-013-4884-7	Unique	Original Research	Passed	Present	Passed	In vitro	Hydrogel	Passed	Included		Other
37	https://doi.org/10.1007/s10971-022-06020-7	Unique	Original Research	Passed	Present	Passed	In vitro	Hydrogel	Passed	Included		Other
38	https://doi.org/10.1016/j.bioadv.2022.212804	Unique	Original Research	Passed	Present	Passed	In vitro	Hydrogel	Passed	Included		Other
39	https://doi.org/10.1016/j.carbpol.2009.06.010	Unique	Original Research	Passed	Present	Passed	In vitro	Hydrogel	Passed	Included		Other
40	https://doi.org/10.1016/j.carbpol.2013.12.017	Unique	Original Research	Passed	Present	Passed	In vitro	Hydrogel	Passed	Included		Other
41	https://doi.org/10.1016/j.carbpol.2016.07.111	Unique	Original Research	Passed	Present	Passed	In vitro	Hydrogel	Passed	Included		Other
42	https://doi.org/10.1016/j.carpta.2021.100084	Unique	Original Research	Passed	Present	Passed	In vitro	Hydrogel	Passed	Included		Other
43	https://doi.org/10.1016/j.colsurfb.2013.11.040	Unique	Original Research	Passed	Present	Passed	In vitro	Hydrogel	Passed	Included		Other
44	https://doi.org/10.1016/j.eurpolymj.2022.111649	Unique	Original Research	Passed	Present	Passed	In vitro	Hydrogel	Passed	Included		Other
45	https://doi.org/10.1016/j.ijbiomac.2010.03.004	Unique	Original Research	Passed	Present	Passed	In vitro	Hydrogel	Passed	Included		Other
46	https://doi.org/10.1016/j.ijbiomac.2016.11.028	Unique	Original Research	Passed	Present	Passed	In vitro	Hydrogel	Passed	Included		Other
47	https://doi.org/10.1016/j.ijbiomac.2019.09.059	Duplicate		Failed						Excluded	Duplicate	Other
48	https://doi.org/10.1016/j.ijbiomac.2020.06.133	Duplicate		Failed						Excluded	Duplicate	Other
49	https://doi.org/10.1016/j.ijbiomac.2023.126275	Duplicate		Failed						Excluded	Duplicate	Other
50	https://doi.org/10.1016/j.xphs.2015.11.019	Unique	Original Research	Passed	Present	Passed	In vitro	Hydrogel	Passed	Included		Other
51	https://doi.org/10.1021/acsami.6b02264	Unique	Original Research	Passed	Present	Passed	In vitro	Hydrogel	Passed	Included		Other
52	https://doi.org/10.1039/C8TB02928H	Unique	Original Research	Passed	Present	Passed	In vitro	Hydrogel	Passed	Included		Other
53	https://doi.org/10.1080/03602559.2013.763361	Unique	Original Research	Passed	Present	Passed	In vitro	Hydrogel	Passed	Included		Other
54	https://doi.org/10.3390/gels7010010	Duplicate		Failed						Excluded	Duplicate	Other
55	https://doi.org/10.4274%2Ftjps.84803	Duplicate		Failed						Excluded	Duplicate	Other

## Sheet: Metadata-After-PRISMA
Sl. No.	DOI	Presence	Article Type	Screening - 1	Kinetics Data	Screening - 2	Kinetics Type	Material Type	Screening-3	Final Status	Source	Year of Publication
1	https://doi.org/10.1016/j.ijbiomac.2019.09.059	Unique	Original Research	Passed	Present	Passed	In vitro	Hydrogel	Passed	Included	PubMed	2019
2	https://doi.org/10.1016/j.jcis.2018.10.048	Unique	Original Research	Passed	Present	Passed	In vitro	Hydrogel	Passed	Included	PubMed	2019
3	https://doi.org/10.1016/j.ijbiomac.2020.06.133	Unique	Original Research	Passed	Present	Passed	In vitro	Hydrogel	Passed	Included	PubMed	2020
4	https://doi.org/10.4274/tjps.84803	Unique	Original Research	Passed	Present	Passed	In vitro	Hydrogel	Passed	Included	PubMed	2016
5	https://doi.org/10.3109/10717544.2014.903535	Unique	Original Research	Passed	Present	Passed	In vitro	Hydrogel	Passed	Included	PubMed	2014
6	https://doi.org/10.1002/mabi.202000299	Unique	Original Research	Passed	Present	Passed	In vitro	Hydrogel	Passed	Included	PubMed	2020
7	https://doi.org/10.3390/gels9050422	Unique	Original Research	Passed	Present	Passed	In vitro	Hydrogel	Passed	Included	PubMed	2023
8	https://doi.org/10.1016/j.msec.2014.09.023	Unique	Original Research	Passed	Present	Passed	In vitro	Hydrogel	Passed	Included	PubMed	2014
9	https://doi.org/10.3390/pharmaceutics11060262	Unique	Original Research	Passed	Present	Passed	In vitro	Hydrogel	Passed	Included	PubMed	2019
10	https://doi.org/10.1016/j.ejpb.2007.12.021	Unique	Original Research	Passed	Present	Passed	In vitro	Hydrogel	Passed	Included	PubMed	2008
11	https://doi.org/10.3390/ph15091106	Unique	Original Research	Passed	Present	Passed	In vitro	Hydrogel	Passed	Included	PubMed	2022
12	https://doi.org/10.1016/j.carbpol.2015.04.022	Unique	Original Research	Passed	Present	Passed	In vitro	Hydrogel	Passed	Included	PubMed	2015
13	https://doi.org/10.1208/s12249-021-02082-y	Unique	Original Research	Passed	Present	Passed	In vitro	Hydrogel	Passed	Included	PubMed	2021
14	https://doi.org/10.1016/j.ijbiomac.2023.126275	Unique	Original Research	Passed	Present	Passed	In vitro	Hydrogel	Passed	Included	PubMed	2023
15	https://doi.org/10.1016/j.ejpb.2020.07.033	Unique	Original Research	Passed	Present	Passed	In vitro	Hydrogel	Passed	Included	PubMed	2020
16	https://doi.org/10.3390/polym12112687	Unique	Original Research	Passed	Present	Passed	In vitro	Hydrogel	Passed	Included	PubMed	2020
17	https://doi.org/10.1016/j.ejpb.2018.04.017	Unique	Original Research	Passed	Present	Passed	In vitro	Hydrogel	Passed	Included	PubMed	2018
18	https://doi.org/10.1081/ddc-100107253	Unique	Original Research	Passed	Present	Passed	In vitro	Hydrogel	Passed	Included	PubMed	2001
19	https://doi.org/10.1002/pi.5587	Unique	Original Research	Passed	Present	Passed	In vitro	Hydrogel	Passed	Included	Other	2018
20	https://doi.org/10.1002/star.201800243	Unique	Original Research	Passed	Present	Passed	In vitro	Hydrogel	Passed	Included	Other	2018
21	https://doi.org/10.1007/s10570-019-02850-x	Unique	Original Research	Passed	Present	Passed	In vitro	Hydrogel	Passed	Included	Other	2020
22	https://doi.org/10.1007/s10856-013-4884-7	Unique	Original Research	Passed	Present	Passed	In vitro	Hydrogel	Passed	Included	Other	2013
23	https://doi.org/10.1007/s10971-022-06020-7	Unique	Original Research	Passed	Present	Passed	In vitro	Hydrogel	Passed	Included	Other	2023
24	https://doi.org/10.1016/j.bioadv.2022.212804	Unique	Original Research	Passed	Present	Passed	In vitro	Hydrogel	Passed	Included	Other	2022
25	https://doi.org/10.1016/j.carbpol.2009.06.010	Unique	Original Research	Passed	Present	Passed	In vitro	Hydrogel	Passed	Included	Other	2009
26	https://doi.org/10.1016/j.carbpol.2013.12.017	Unique	Original Research	Passed	Present	Passed	In vitro	Hydrogel	Passed	Included	Other	2014
27	https://doi.org/10.1016/j.carbpol.2016.07.111	Unique	Original Research	Passed	Present	Passed	In vitro	Hydrogel	Passed	Included	Other	2016
28	https://doi.org/10.1016/j.carpta.2021.100084	Unique	Original Research	Passed	Present	Passed	In vitro	Hydrogel	Passed	Included	Other	2021
29	https://doi.org/10.1016/j.colsurfb.2013.11.040	Unique	Original Research	Passed	Present	Passed	In vitro	Hydrogel	Passed	Included	Other	2014
30	https://doi.org/10.1016/j.eurpolymj.2022.111649	Unique	Original Research	Passed	Present	Passed	In vitro	Hydrogel	Passed	Included	Other	2022
31	https://doi.org/10.1016/j.ijbiomac.2010.03.004	Unique	Original Research	Passed	Present	Passed	In vitro	Hydrogel	Passed	Included	Other	2010
32	https://doi.org/10.1016/j.ijbiomac.2016.11.028	Unique	Original Research	Passed	Present	Passed	In vitro	Hydrogel	Passed	Included	Other	2017
33	https://doi.org/10.1016/j.xphs.2015.11.019	Unique	Original Research	Passed	Present	Passed	In vitro	Hydrogel	Passed	Included	Other	2016
34	https://doi.org/10.1021/acsami.6b02264	Unique	Original Research	Passed	Present	Passed	In vitro	Hydrogel	Passed	Included	Other	2016
35	https://doi.org/10.1039/C8TB02928H	Unique	Original Research	Passed	Present	Passed	In vitro	Hydrogel	Passed	Included	Other	2019
36	https://doi.org/10.1080/03602559.2013.763361	Unique	Original Research	Passed	Present	Passed	In vitro	Hydrogel	Passed	Included	Other	2013

## Sheet: Meta-Data
Sl. No.	First Author	Hydrogel	t1/2 (h)	t3/4 (h)	CDR Max	CDR Max time (h)	Lag Time (Y/N)	Burst Release (Y/N)	Injectability (Y/N)	Biocompatibility (Y/N)	Biodegradability (Y/N)	Drug Loading (%)	Drug Entrapment (%)	Experimental Conditions		REF	Year of Publication
														pH	T (0C)
1	Niu, B.	Sodium alginate/carboxymethyl chitosan-ZnO hydrogel beads	2.5	4.5	100	7	N	N	N	Y	NR	7.56	82.3	7.4	37	https://doi.org/10.1016/j.ijbiomac.2019.09.059	2019
2	Cracium, AM.	Nitrosalicyl-imine-chitosan hydrogel	8	84	85	96	N	N	Y	Y	Y	NR	NR	7.4	37	https://doi.org/10.1016/j.jcis.2018.10.048	2019
3	Gull, N.	Chitosan/polyvinyl pyrrolidone/epichlorohydrin hydrogel	1.5	2	80	2	N	Y	N	Y	Y	4	84	7.4	37	https://doi.org/10.1016/j.ijbiomac.2020.06.133	2020
4	KUCUKTURKMEN, B.	Chitosan/poloxamer 407 hydrogel	10	inf	60	24	N	N	Y	NR	NR	NR	56.1	7.4	37	https://doi.org/10.4274/tjps.84803	2016
5	Luo, Z.	PEG–PCL–PEG (PECE) hydrogel	16	48	100	72	Y	N	Y	Y	NR	NR	NR	7.4	37	https://doi.org/10.3109/10717544.2014.903535	2014
6	Ha, W.	Attapulgite/ cyclodextrin pseudopolyrotaxane hydrogel	60	75	92	100	N	Y	Y	Y	NR	NR	77.28	7.4	37	https://doi.org/10.1002/mabi.202000299	2020
7	Himiniuc, LM.	Chitosan/2-hydroxybenzaldehyde hydrogel	50	inf	72	240	N	Y	N	NR	NR	NR	NR	7.4	37	https://doi.org/10.3390/gels9050422	2023
8	Mahdavinia, GR.	CaraPVA IPN nanocomposite hydrogel	3.5	5	82	5.5	Y	N	Y	NR	NR	NR	55	7.4	37	https://doi.org/10.1016/j.msec.2014.09.023	2014
9	Torres-Luna, C.	Poly-2-hydroxyethyl methacrylate (pHEMA) hydrogel	4	10	99	100	N	N	N	Y	NR	NR	NR	7.4	37	https://doi.org/10.3390/pharmaceutics11060262	2019
10	Geever, LM.	Poly(N-isopropylacrylamide)–poly(vinylpyrrolidinone)/poly(ethylene glycol) dimethacrylate hydrogel	1	2.5	100	10	N	Y	N	N	NR	NR	NR	7.4	37	https://doi.org/10.1016/j.ejpb.2007.12.021	2008
11	Mahmoud, TM.	DNA-BSVC hydrogel	6	inf	65	8	Y	N	N	Y	NR	NR	93.2	7.4	37	https://doi.org/10.3390/ph15091106	2022
12	Mahdavinia, GR.	Caboxymethyl chitosan/ κ-carrageenan hydrogel	0.8	2	82	2.5	N	Y	N	NR	NR	NR	48	7.4	37	https://doi.org/10.1016/j.carbpol.2015.04.022	2015
13	Rehman, S.	Eudragit S-100-coated hydrogel beads	1.5	3	90	4	N	N	N	Y	Y	62.01	97.99	7.4	37	https://doi.org/10.1208/s12249-021-02082-y	2021
14	Qureshi, MAUR.	Guar gum/PVP/graphene oxide hydrogel	0.5	1.25	88	2	N	Y	N	Y	Y	NR	NR	7.4	37	https://doi.org/10.1016/j.ijbiomac.2023.126275	2023
15	Torres-Luna, C.	mPDMS/DMA/HEMA/TEGDMA/PVP based hydrogel contact lens	150	inf	60	450	N	N	N	Y	NR	NR	NR	7.4	37	https://doi.org/10.1016/j.ejpb.2020.07.033	2020
16	Ailincai, D.	Imino-Chitosan Amphiphiles based hydrogel	6	72	90	96	Y	N	N	NR	N	NR	NR	7.4	37	https://doi.org/10.3390/polym12112687	2020
17	Zhu, Q.	EC10/S100 blend film	2	12	88	12	N	N	Y	Y	Y	NR	NR	7.4	37	https://doi.org/10.1016/j.ejpb.2018.04.017	2018
18	Orienti, I.	Cross-linked PVA hydrogel	2.5	4	80	4	N	N	N	NR	NR	NR	NR	7.4	37	https://doi.org/10.1081/ddc-100107253	2001
19	Babaladimath, G.	Pectin based nanocomposite hydrogel	2	3.5	95	8	N	N	N	NR	NR	68.84	NR	7.4	37	https://doi.org/10.1002/pi.5587	2018
20	Nada, AA.	Starch/adipic acid dihydrazide hydrogels	1	4	80	4	N	Y	N	Y	NR	NR	NR	7.4	37	https://doi.org/10.1002/star.201800243	2018
21	Schnell, C.	Xylan/chitosan hydrogel	0.16	0.67	85	1	N	Y	N	NR	NR	25.5	NR	7.4	37	https://doi.org/10.1007/s10570-019-02850-x	2020
22	Giri, TK.	IPN hydrogel beads of pectin and grafted alginate	4	9	80	9	Y	N	N	NR	Y	NR	65.7	7.4	37	https://doi.org/10.1007/s10856-013-4884-7	2013
23	Do, NHN.	Chitosan/β-glycerophosphate hydrogel	0.5	2	82	5	N	Y	N	NR	NR	0.5	NR	7.4	37	https://doi.org/10.1007/s10971-022-06020-7	2023
24	Yi, X.	Collagen-oxidized hyaluronic acid hydrogel	20	30	80	120	Y	N	Y	NR	Y	NR	NR	7.4	37	https://doi.org/10.1016/j.bioadv.2022.212804	2022
25	Wang, Q.	Chitosan-g-poly (acrylic acid)/attapulgite/sodium alginate composite hydrogel bead	0.3	0.5	98	2	N	Y	N	NR	NR	41.5	78	7.4	37	https://doi.org/10.1016/j.carbpol.2009.06.010	2009
26	Zhang, L.	Carboxymethyl chitosan/N-isopropylacrylamide hydrogel	5	20	88	25	N	N	Y	Y	Y	NR	NR	7.4	37	https://doi.org/10.1016/j.carbpol.2013.12.017	2014
27	Dinu, MV.	3D chitosan/clinoptilolite biocomposite cryogels	1	4	88	8	N	Y	N	NR	NR	NR	NR	7.4	37	https://doi.org/10.1016/j.carbpol.2016.07.111	2016
28	Tan, LS.	Carboxymethyl sago pulp/chitosan hydrogel	7	15	80	15	N	N	N	NR	NR	16.75	55.84	6.8	37	https://doi.org/10.1016/j.carpta.2021.100084	2021
29	Al-Kahtani, A.	Acrylamide-grafted-sodium alginate microspheres	8	14	88	14	Y	N	N	NR	NR	20	85	7.4	37	https://doi.org/10.1016/j.colsurfb.2013.11.040	2014
30	Kaufmann, G.	Chitosan-genipin hydrogel	3	8	95	24	Y	N	N	N	NR	NR	NR	7.4	37	https://doi.org/10.1016/j.eurpolymj.2022.111649	2022
31	Hua, S.	Sodium alginate/poly(vinyl alcohol) hydrogel beads	41.5	78	98	8	N	Y	N	Y	NR	NR	98.37	7.4	37	https://doi.org/10.1016/j.ijbiomac.2010.03.004	2010
32	Xu, X.	ULD-TIP1 and ULD-GGGWRESAI Pure protein hydrogel	0.5	2	92	12	N	Y	Y	Y	Y	NR	NR	7.4	37	https://doi.org/10.1016/j.ijbiomac.2016.11.028	2017
33	Qi, X.	Alginate microspheres-chitosan and/or β-GP hydrogels	6	24	88	45	N	N	Y	Y	NR	25.29	NR	7.4	37	https://doi.org/10.1016/j.xphs.2015.11.019	2016
34	Dragan, ES.	PDMAEM/PAAm based IPN Hydrogel	0.5	1.5	98	4	N	Y	N	NR	NR	NR	NR	7.4	37	https://doi.org/10.1021/acsami.6b02264	2016
35	Huang, D.	PEG–PLGA microcapsule loaded PEG hydrogels	5	24	90	20	N	Y	N	Y	Y	5.69	54	7.4	37	https://doi.org/10.1039/C8TB02928H	2019
36	Bhattacharya, SS.	Sodium carboxymethyl cellulose/sodium carboxymethyl xanthan gum hydrogel beads	225	400	90	500	Y	N	N	NR	NR	NR	91.25	7.4	37	https://doi.org/10.1080/03602559.2013.763361	2013
